# Supplementary material for: Monitoring of Plasma EGFR Mutations during Osimertinib Treatment for NSCLC Patients with Acquired T790M Mutation
Source: MDPI journal article supplement (doi:10.3390/cancers15174231), 2023-08-24

Supplementary Figure S1

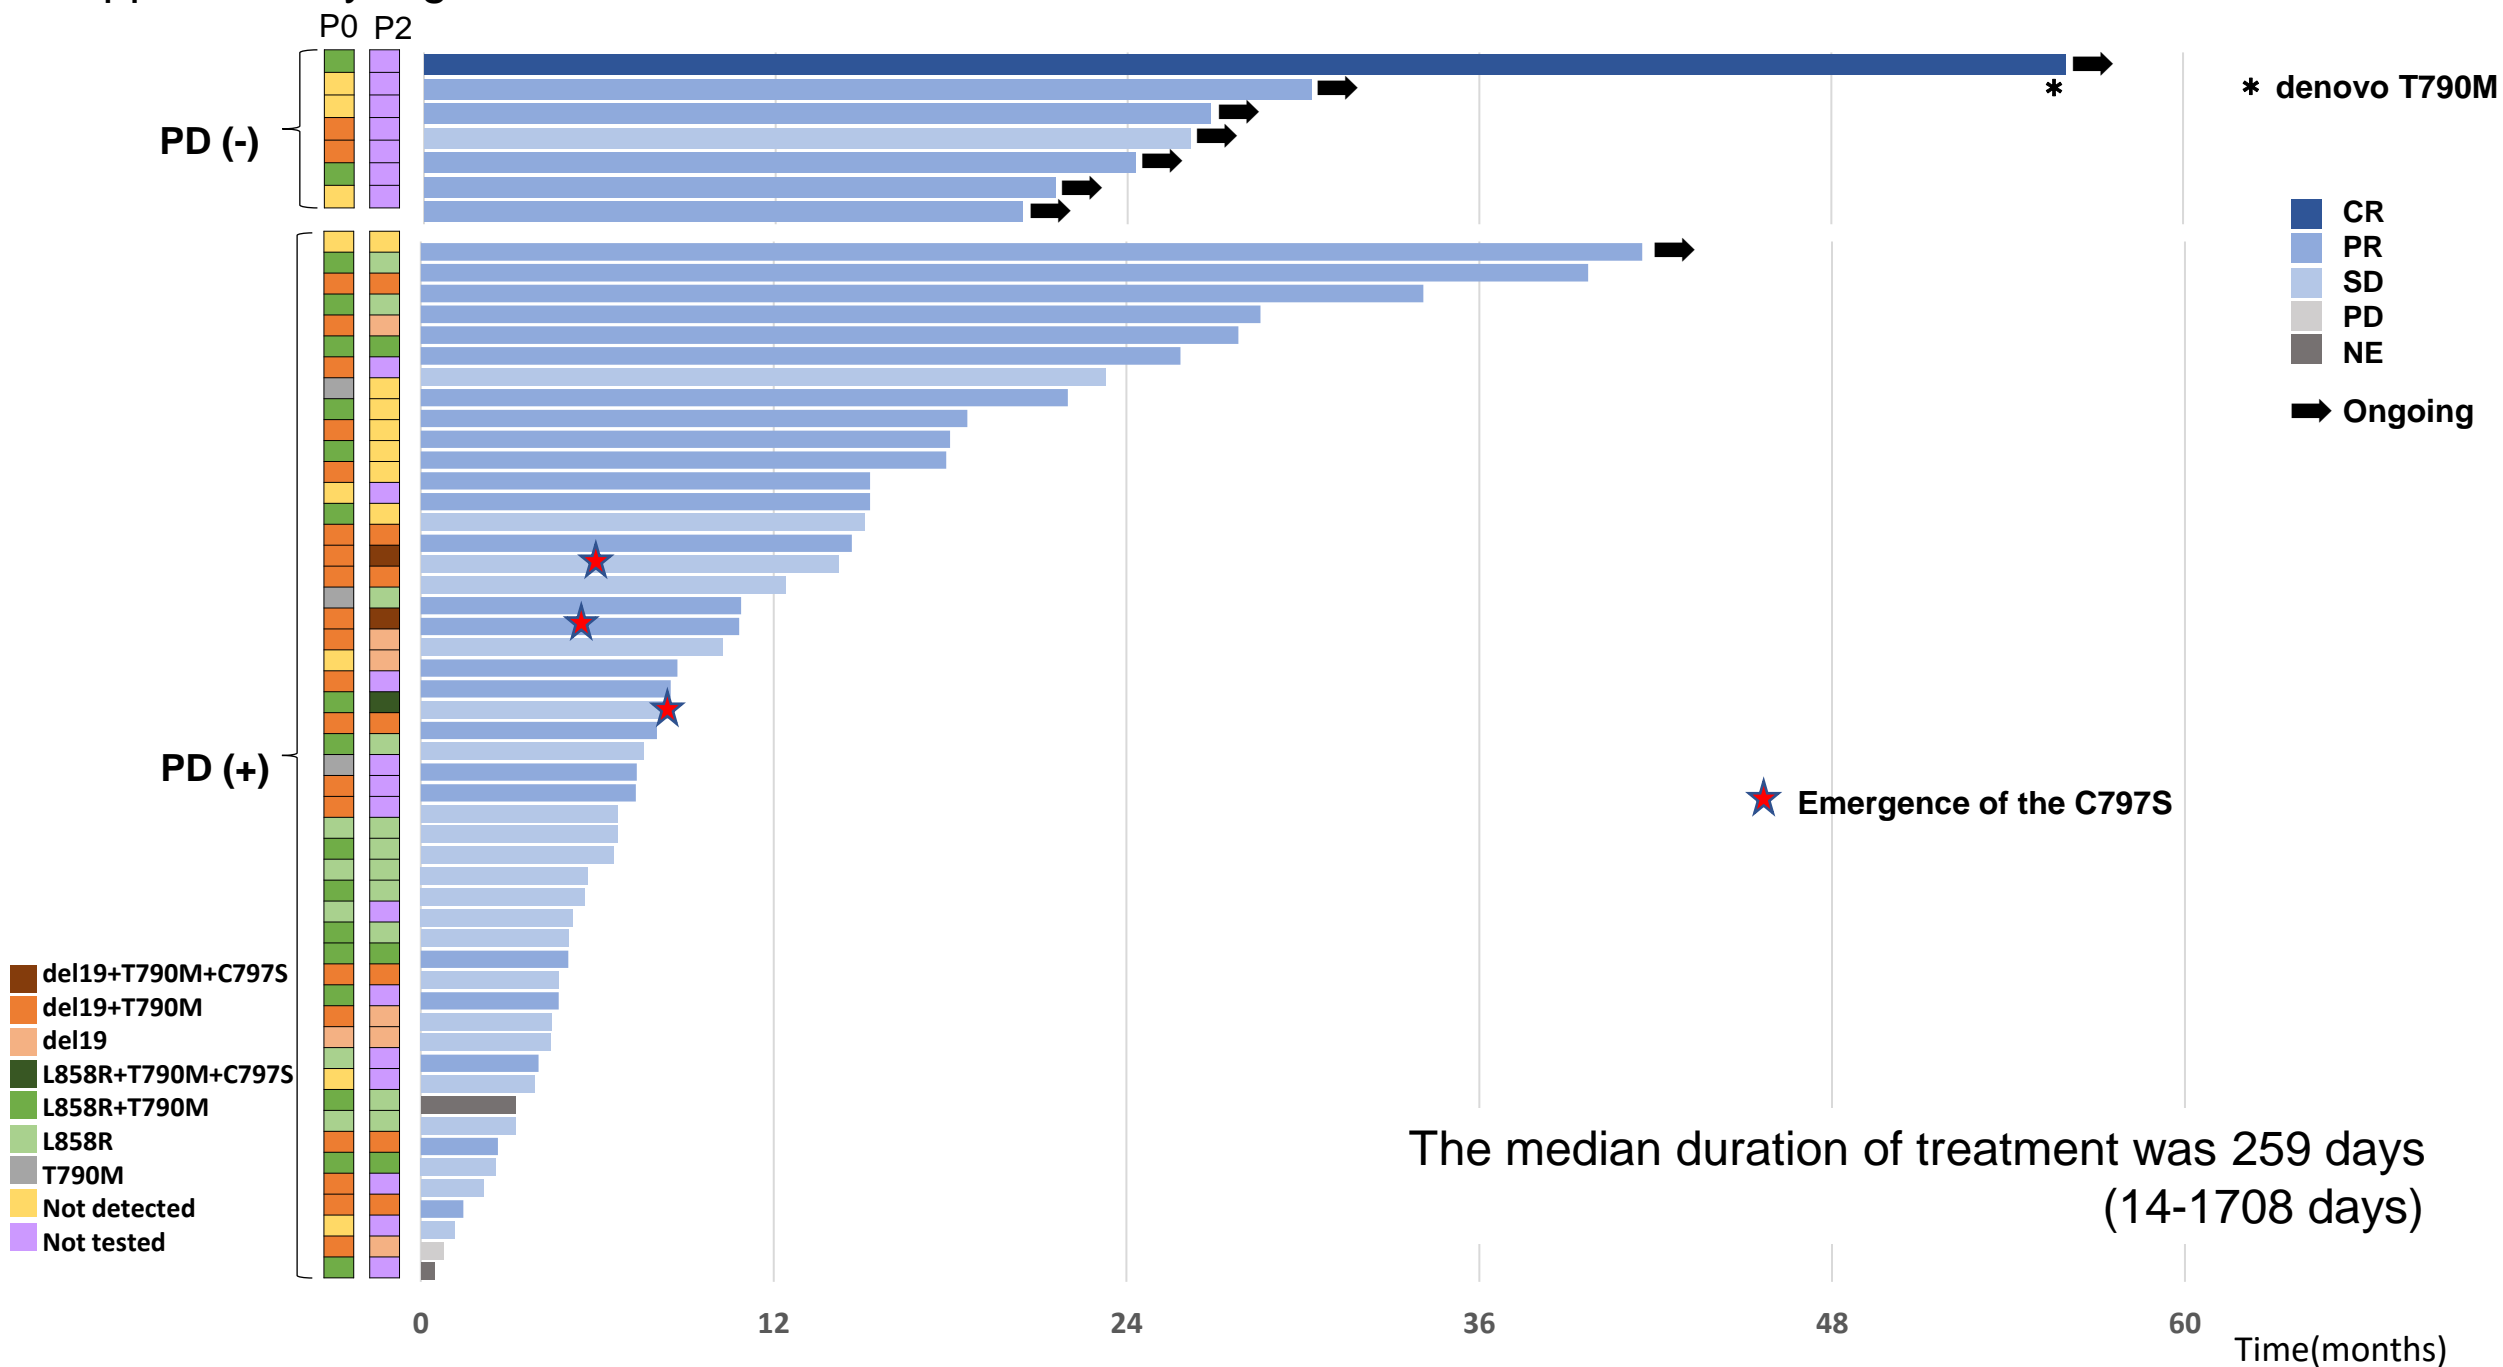

Supplementary Figure S2

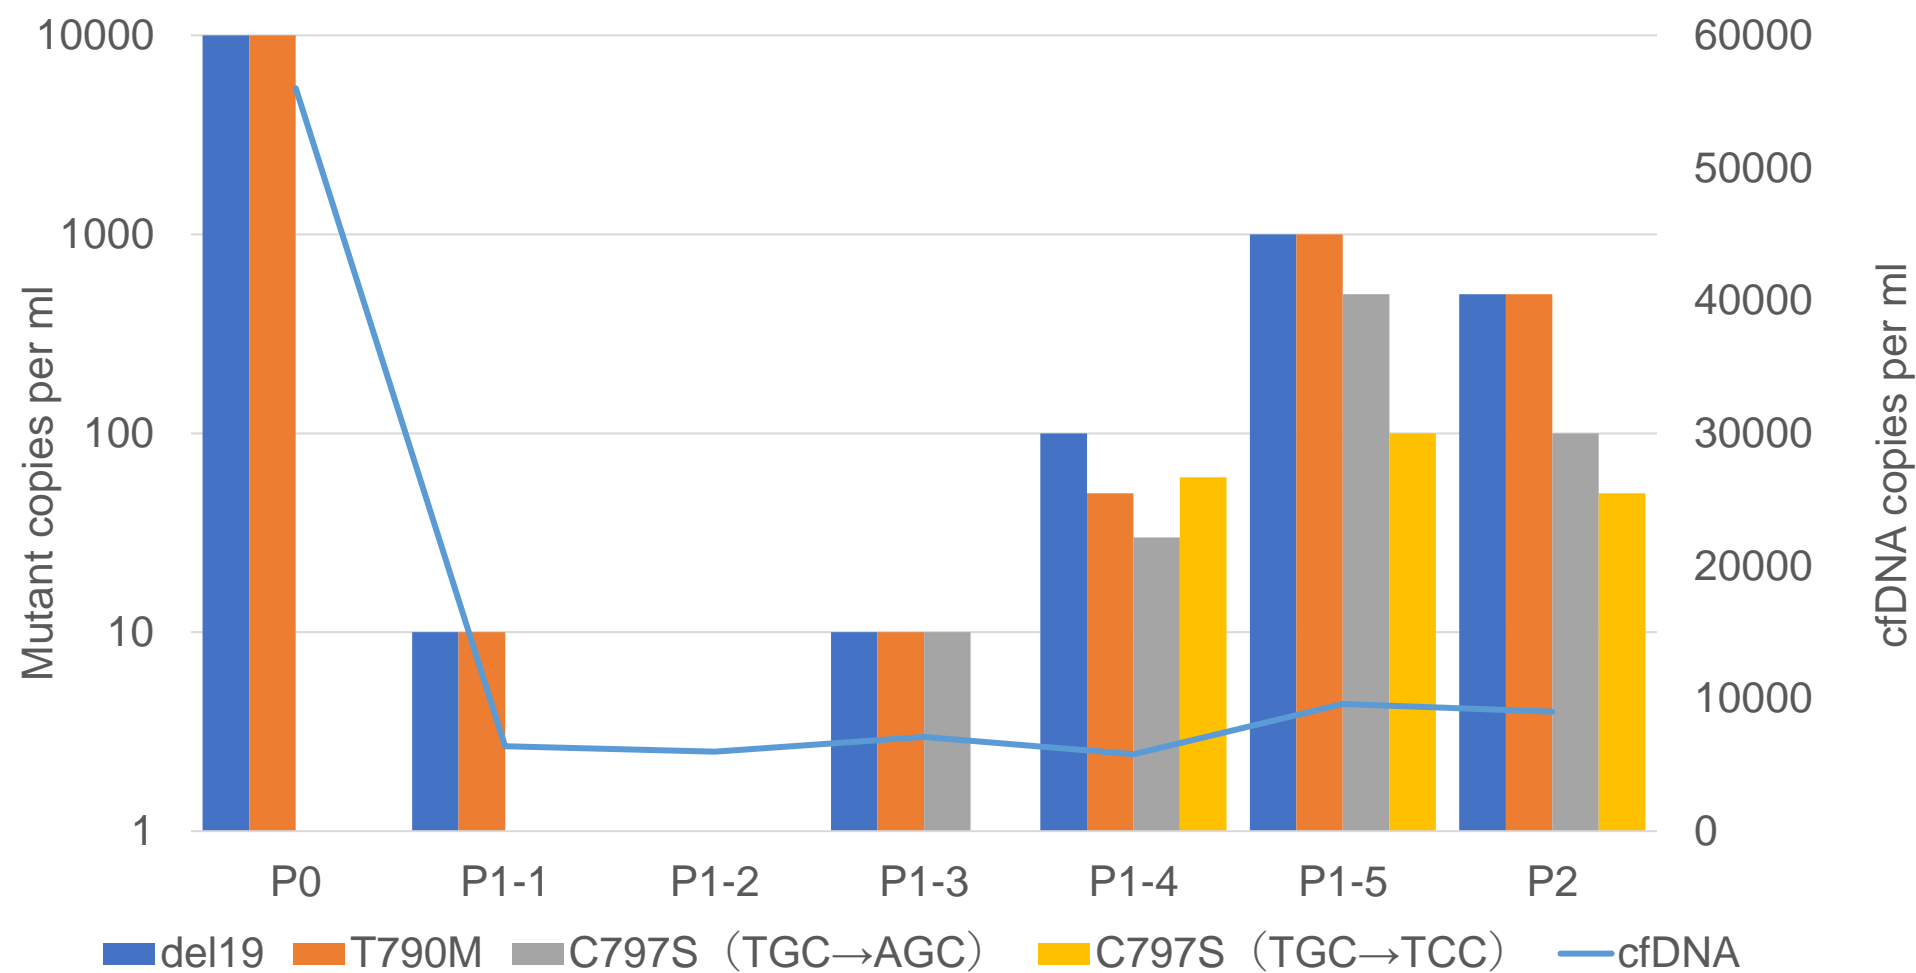

Response evaluation by image

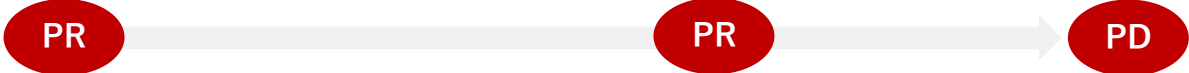

Developed meningitis carcinomatosa

Supplementary Figure S3

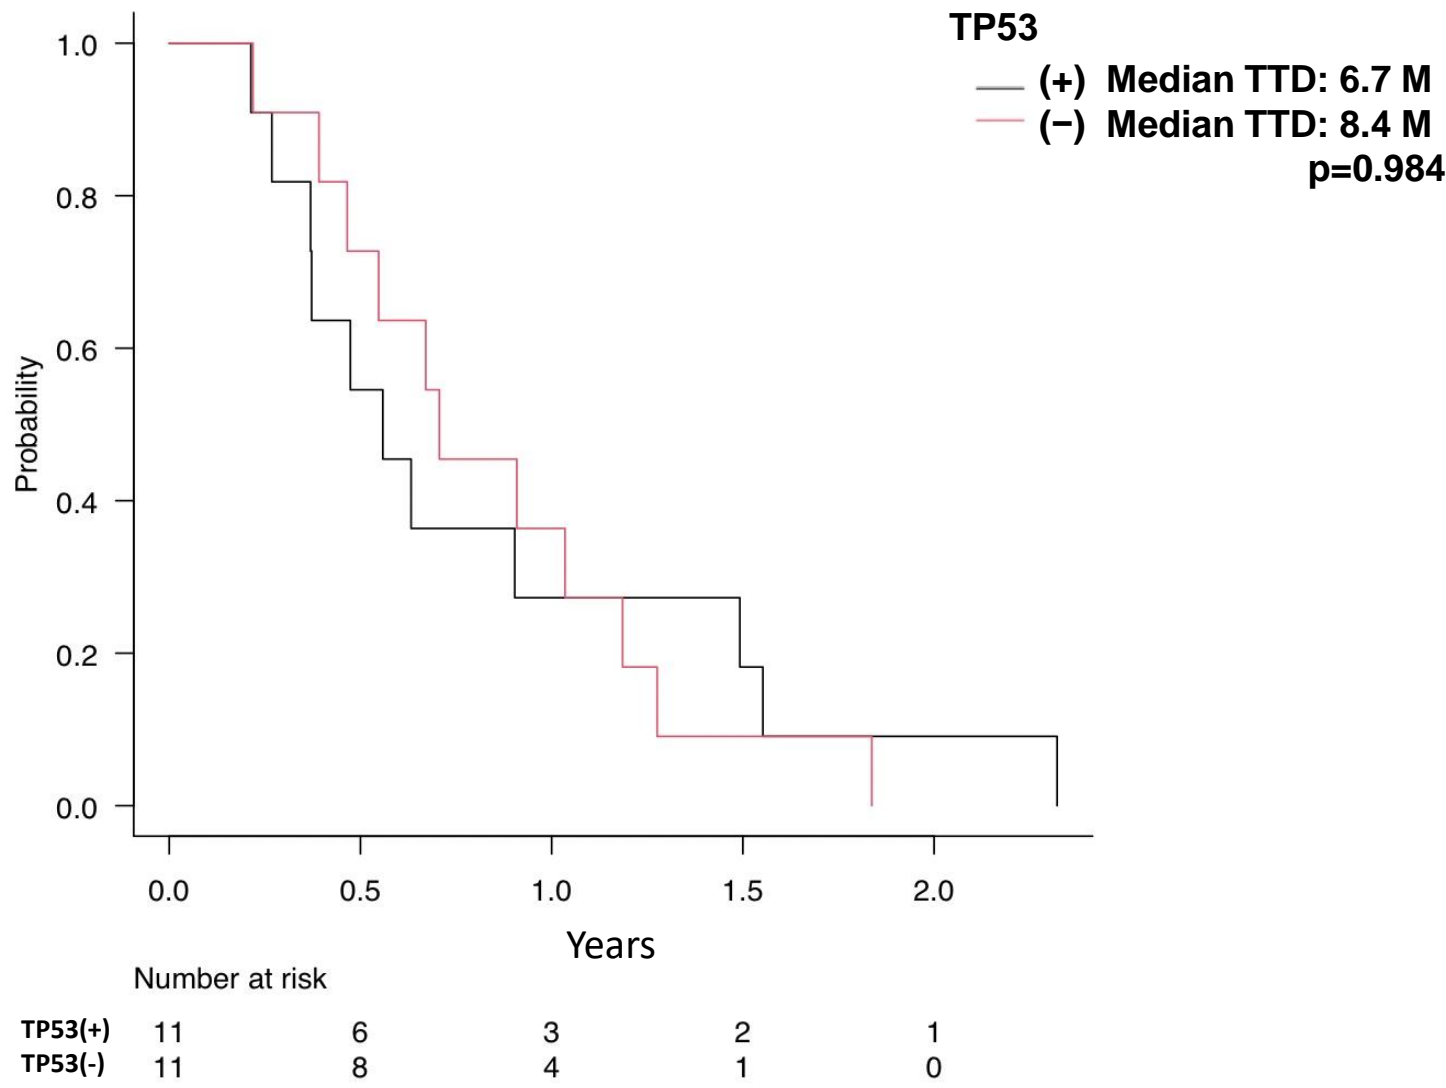

Supplement: s1 [file s1]
